# Supplementary material for: Fuzzy Evaluation of Water Quality Based on Micronucleus Technology of Vicia faba Root Tip
Source: Hindawi journal article supplement (doi:10.1155/2019/3047362), 2019-01-01
Supplement: f1 [file 3047362.f1.docx]

**Appendix** Water quality sampling data of Chaohu Lake

| Month | Position |  |  |  |  |  |  |
| --- | --- | --- | --- | --- | --- | --- | --- |
| April | W1 | 7.80 | 0.932 | 5.33 | 0.196 | 2.325 | 3.65 |
| W2 | 6.81 | 3.841 | 16.8 | 0.282 | 3.281 | 4.57 |
| W3 | 8.92 | 0.501 | 3.82 | 0.021 | 0.482 | 1.58 |
| W4 | 7.86 | 0.323 | 3.94 | 0.035 | 0.64 | 1.68 |
| W5 | 7.95 | 0.213 | 4.78 | 0.018 | 0.232 | 1.32 |
| W6 | 8.28 | 0.433 | 4.21 | 0.046 | 0.762 | 1.82 |
| May | W1 | 7.43 | 1.712 | 5.05 | 0.103 | 1.829 | 3.39 |
| W2 | 7.01 | 3.875 | 11.86 | 0.273 | 3.161 | 4.32 |
| W3 | 7.81 | 0.951 | 3.88 | 0.038 | 0.671 | 1.52 |
| W4 | 6.63 | 0.211 | 3.75 | 0.047 | 0.582 | 1.72 |
| W5 | 8.87 | 0.192 | 4.72 | 0.021 | 0.322 | 1.21 |
| W6 | 8.10 | 0.381 | 4.36 | 0.036 | 0.621 | 1.61 |
| June | W1 | 8.16 | 2.311 | 6.73 | 0.137 | 1.278 | 3.15 |
| W2 | 4.28 | 3.521 | 10.81 | 0.181 | 3.022 | 3.21 |
| W3 | 7.65 | 0.751 | 4.32 | 0.052 | 0.455 | 1.61 |
| W4 | 5.46 | 0.381 | 4.97 | 0.028 | 0.479 | 1.48 |
| W5 | 5.21 | 0.201 | 4.47 | 0.021 | 0.261 | 1.23 |
| W6 | 7.56 | 0.262 | 5.67 | 0.067 | 0.561 | 1.38 |
| July | W1 | 3.73 | 3.204 | 7.12 | 0.238 | 1.079 | 2.98 |
| W2 | 3.89 | 2.021 | 8.43 | 0.171 | 2.211 | 3.55 |
| W3 | 4.21 | 1.123 | 6.08 | 0.085 | 1.077 | 1.73 |
| W4 | 6.57 | 0.256 | 6.22 | 0.072 | 0.722 | 1.32 |
| W5 | 4.89 | 0.222 | 3.66 | 0.023 | 0.311 | 1.41 |
| W6 | 6.28 | 0.322 | 5.18 | 0.082 | 0.433 | 1.58 |
| August | W1 | 5.88 | 4.291 | 7.81 | 0.189 | 1.052 | 3.23 |
| W2 | 4.02 | 1.841 | 7.26 | 0.157 | 1.977 | 2.86 |
| W3 | 5.82 | 1.031 | 7.82 | 0.103 | 1.381 | 1.69 |
| W4 | 3.19 | 0.221 | 7.34 | 0.086 | 0.662 | 1.58 |
| W5 | 5.48 | 0.145 | 3.74 | 0.019 | 0.282 | 1.36 |
| W6 | 6.57 | 0.213 | 5.42 | 0.079 | 0.411 | 1.42 |
